# Supplementary material
Source: ML conference proceedings conference paper supplement (https://openreview.net/forum?id=vbKiLBDdUE)

Expert GES

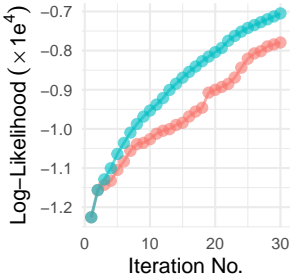

Supplement: supplementary_material [file attachment]

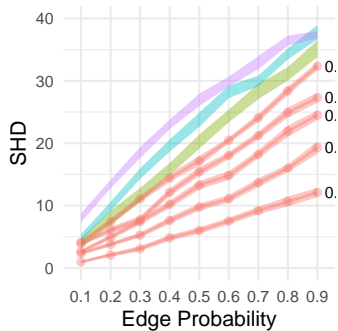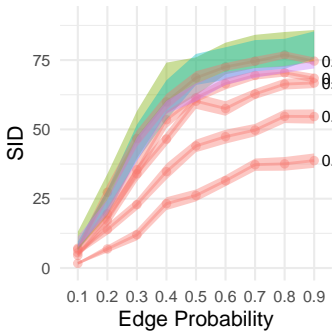

Supplement: supplementary_material [file attachment]

Expert Hill-Climb Search PC

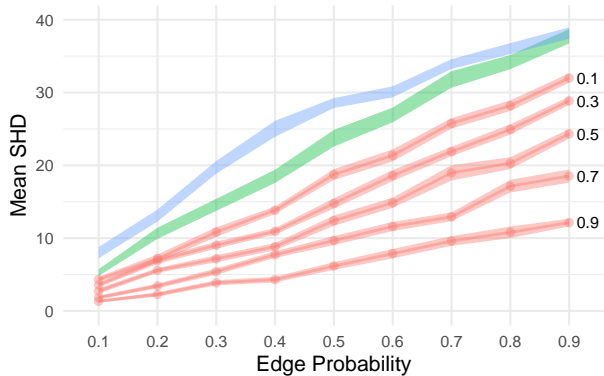

Supplement: supplementary_material [file attachment]

Expert Hill-Climb Search PC

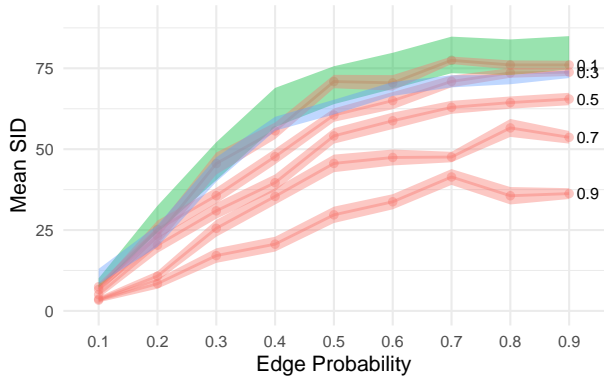

Supplement: supplementary_material [file attachment]

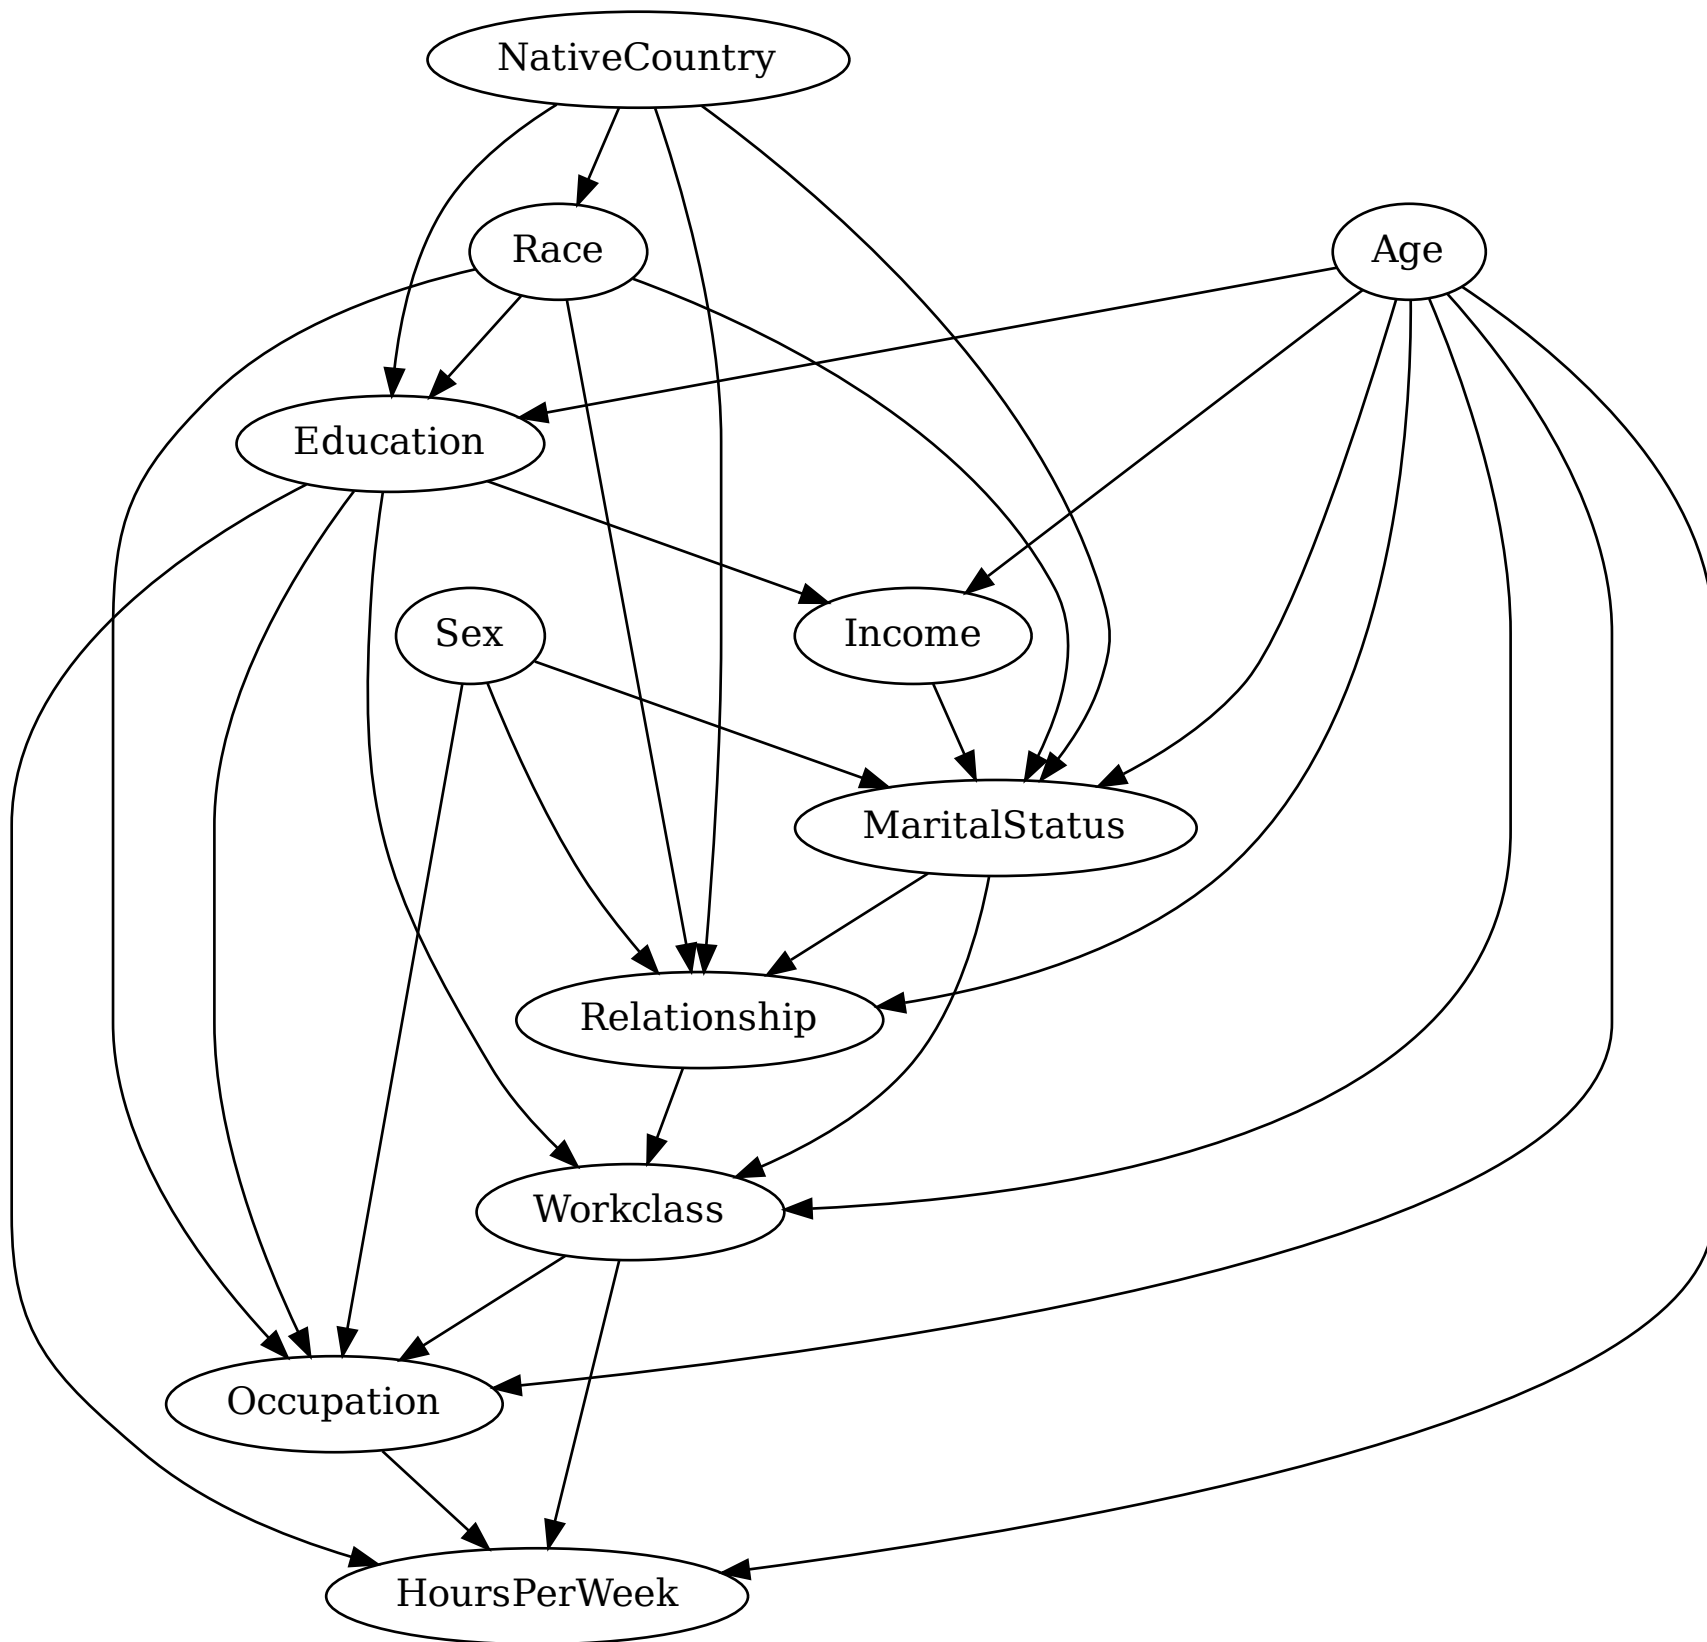

Supplement: supplementary_material [file attachment]

Expert GES

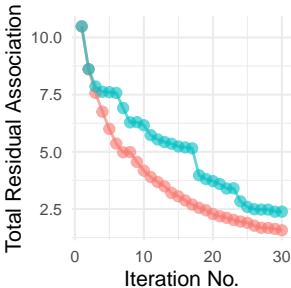

Supplement: supplementary_material [file attachment]

— Expert — GES

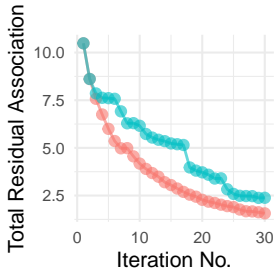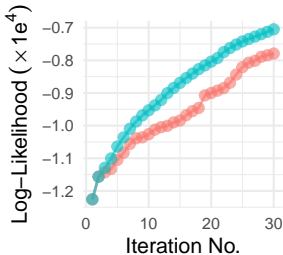

Supplement: supplementary_material [file attachment]

Expert GES Hill-Climb PC

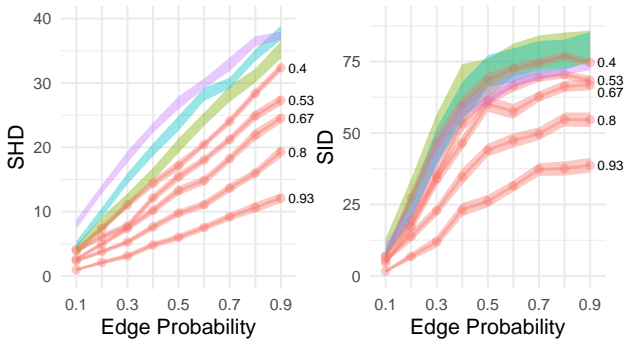

Supplement: supplementary_material [file attachment]
